# Supplementary material for: Direct chemical vapour generation-flame atomization as interface of high performance liquid chromatography-atomic fluorescence spectrometry for speciation of mercury without using post-column digestion
Source: Royal Society of Chemistry journal article supplement (doi:10.1039/b907169e), 2009-01-01

## Electronic supplementary information

Direct chemical vapour generation-flame atomization as interface of high performance liquid chromatography-atomic fluorescence spectrometry for speciation of mercury without using post-column digestion

Yong-guang Yin<sup>a</sup>, Zhen-hua Wang<sup>a</sup>, Jin-feng Peng<sup>b</sup>, Jing-fu Liu<sup>a\*</sup>, Bin He<sup>a</sup>, Gui-bin Jiang<sup>a</sup>

<sup>a</sup> State Key Laboratory of Environmental Chemistry and Ecotoxicology, Research Center for Eco-Environmental Sciences, Chinese Academy of Sciences, P.O. Box 2871, Beijing 100085, China

<sup>b</sup> Food Safety Testing Subsection, Inspection and Quarantine Technology Center, Ningbo Entry-Exit Inspection and Quarantine Bureau, Ningbo 315012, China

### Figures

**Fig. S1** Effect of HCl concentration on intensities of mercury compounds. Concentration of mercury species: 50  $\mu\text{g L}^{-1}$ . Flow rate of  $\text{KBH}_4$ : 1  $\text{mL min}^{-1}$ . Flow rate of carrier gas: 600  $\text{mL min}^{-1}$ . Other conditions were given in Table 1.

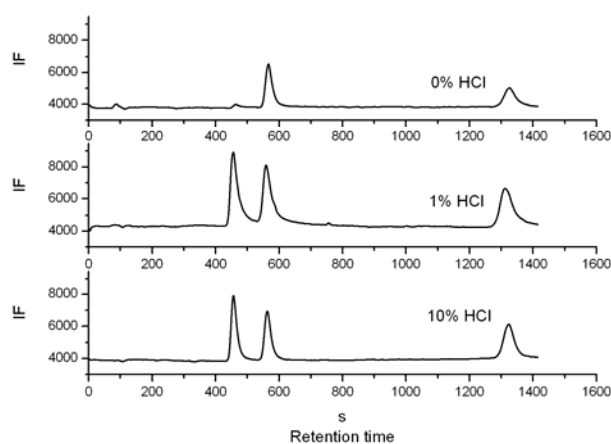

**Fig. S2** Effect of concentration of  $\text{KBH}_4$  on the intensities of mercury compounds. Concentration of mercury species:  $50 \mu\text{g L}^{-1}$ . Flow rate of  $\text{KBH}_4$ :  $1 \text{ mL min}^{-1}$ . Flow rate of carrier gas:  $600 \text{ mL min}^{-1}$ . Other conditions were given in Table 1.

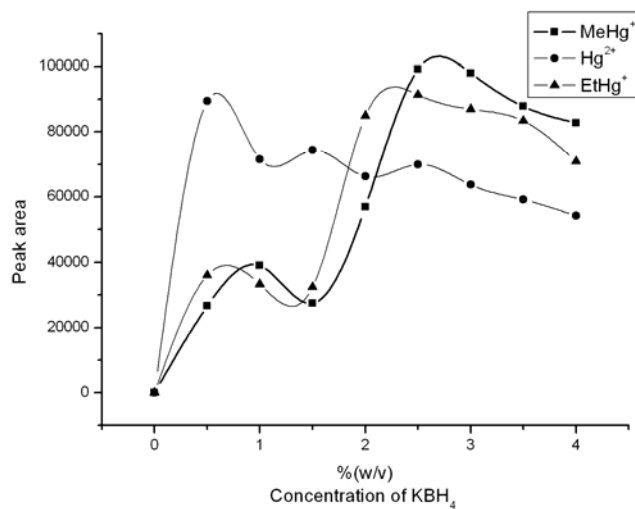

**Fig. S3** Effect of flow rate of  $\text{KBH}_4$  on the intensities of mercury compounds. Concentration of mercury species:  $50 \mu\text{g L}^{-1}$ . Flow rate of carrier gas:  $600 \text{ mL min}^{-1}$ . Other conditions were given in Table 1.

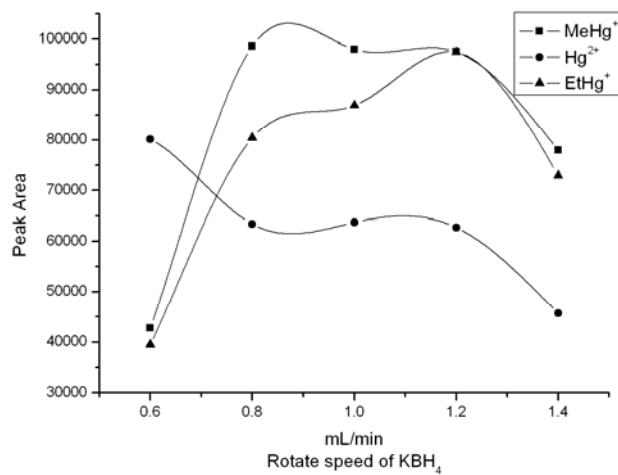

**Fig. S4** Effect of flow rate of carrier gas on the intensities of mercury compounds. Concentration of mercury species:  $50 \mu\text{g L}^{-1}$ . Other conditions were given in Table 1.

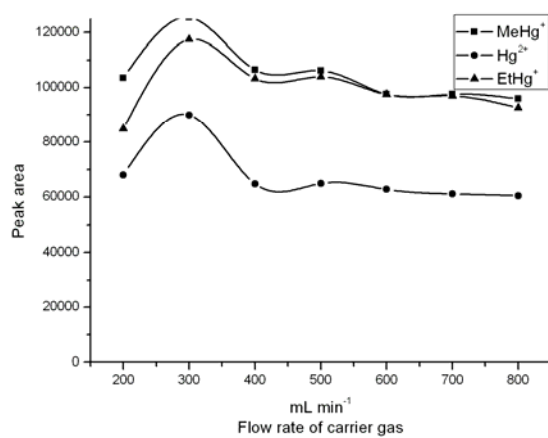

Supplement: b907169e.pdf [file b907169e.pdf]
